# Supplementary material for: Immunological landscape of consensus clusters in colorectal cancer
Source: PubMed Central journal article supplement (PMC5739639; doi:10.18632/oncotarget.22169), 2017-10-27
Supplement: oncotarget-08-105299-s001.pdf [file oncotarget-08-105299-s001.pdf]

## Immunological landscape of consensus clusters in colorectal cancer

### SUPPLEMENTARY MATERIALS

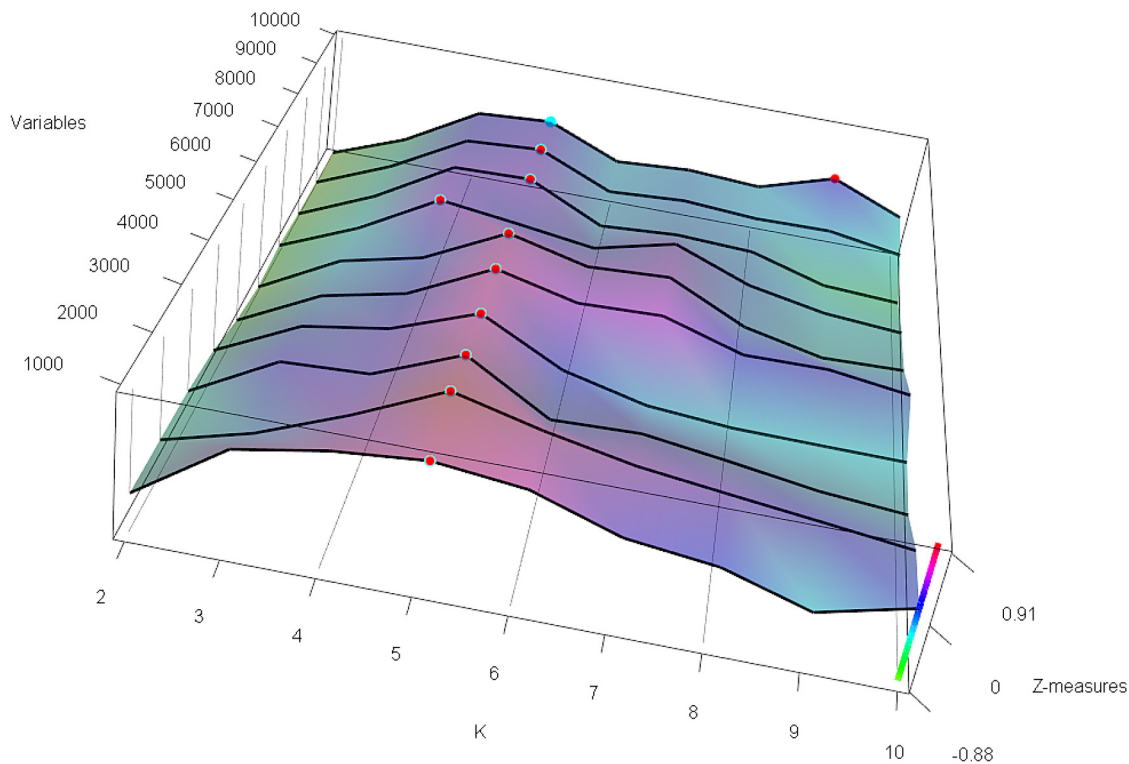

**Supplementary Figure 1: 3D topographic map depicting estimation of optimal number of clusters (K) based on COMMUNAL clustering of 1492 samples.** Integrative clustering has been performed by use of 5 clustering algorithms ('hierarchical', 'kmeans', 'pam', 'som' and 'agnes') and 11 cluster validity metrics ('Connectivity', 'average.between', 'g2', 'avg.silwidth', 'average.within', 'dunn', 'widestgap', 'dunn2', 'pearsongamma', 'g3' and 'min.separation') across the increasing variable subsets (from 1000 to 10000). We used correlation distance with an average agglomeration method. Red dot indicate potentially optimal K for a given variable subset. Note that optimal K=5 is seen in 8 out of 10 variable subsets. Please see Sweeney *et al.*, for the details.

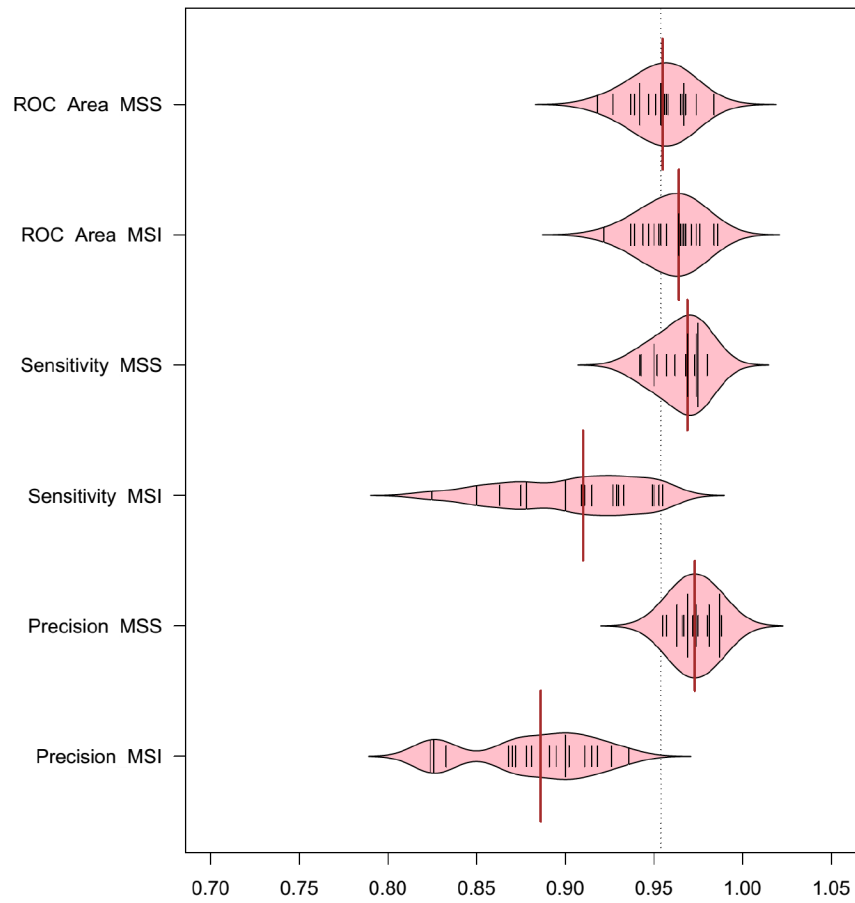

**Supplementary Figure 2: Bean plots illustrating performance of MSI classifier for 20 randomly generated test sets.** Sensitivity, recall and ROC curve are shown for MSI and MSS classes, respectively. Means are marked with red lines, each measurement is depicted by a black line.

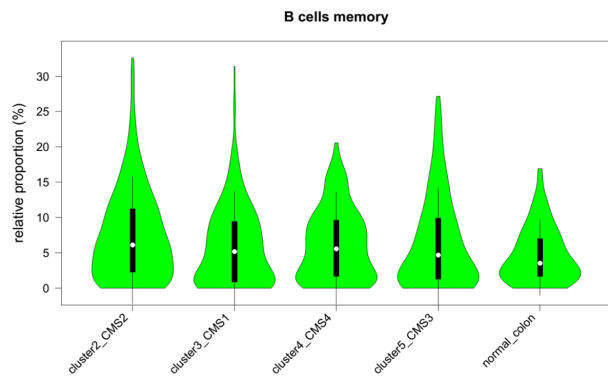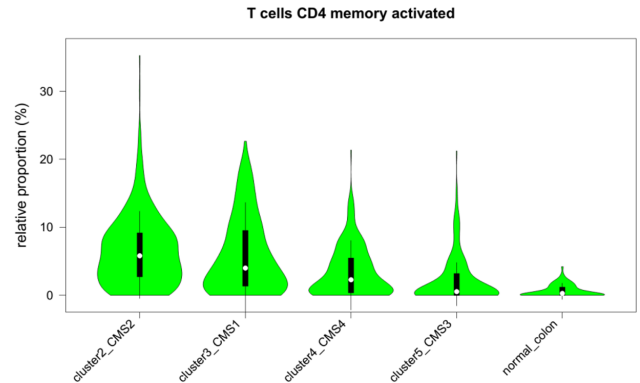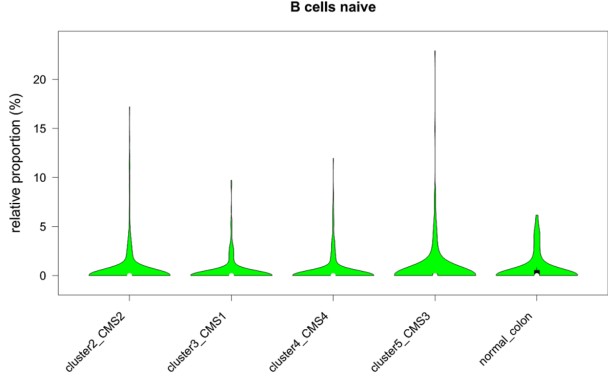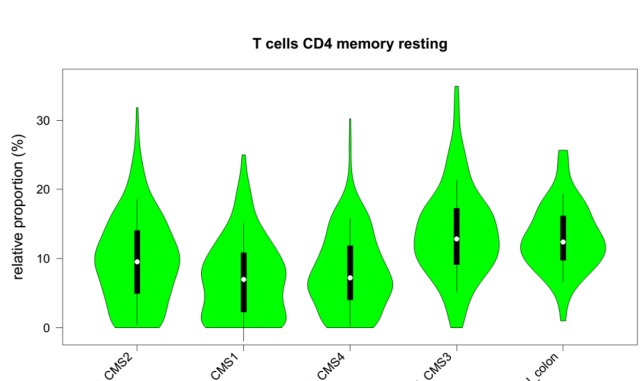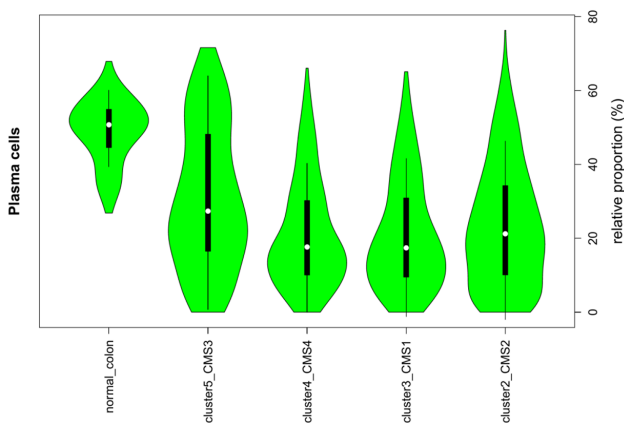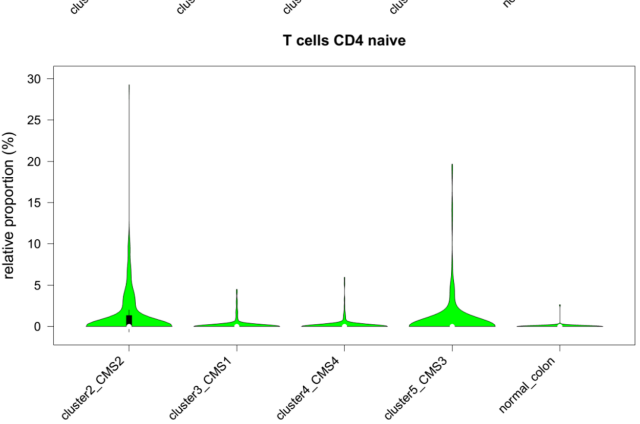

(Continued)

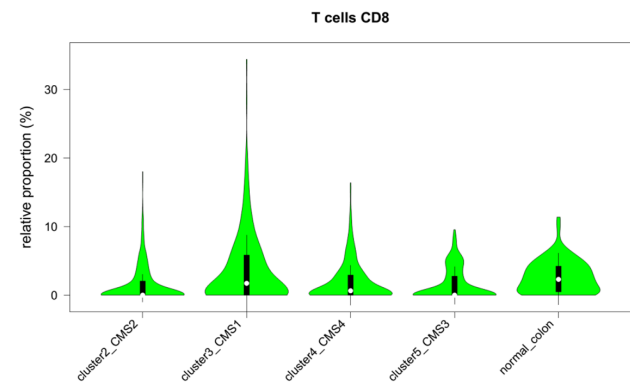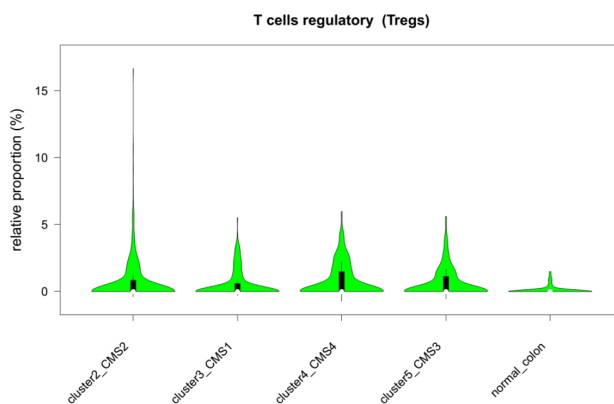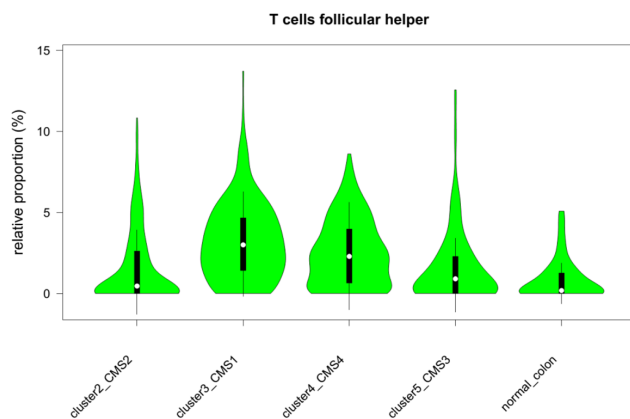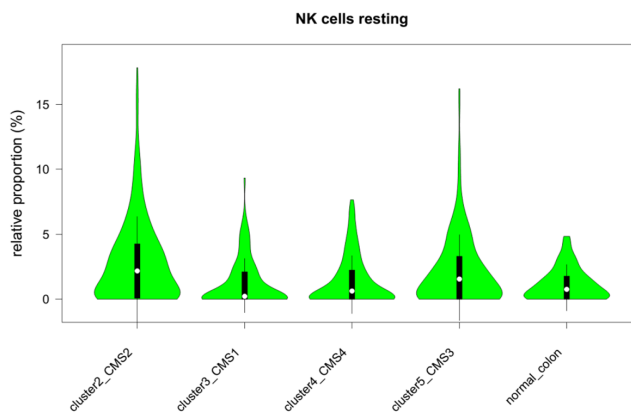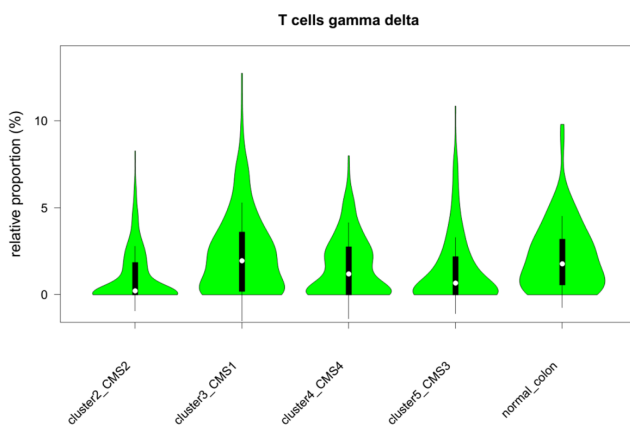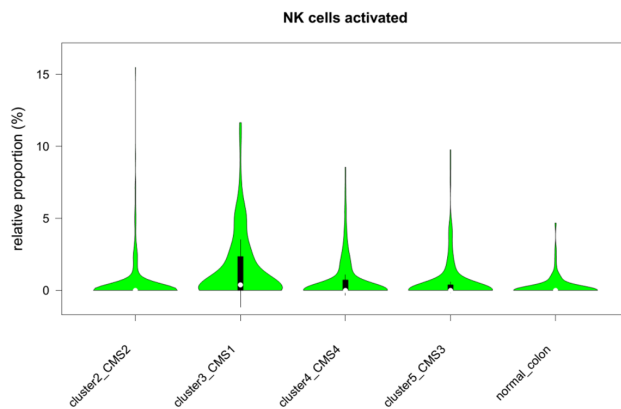

(Continued)

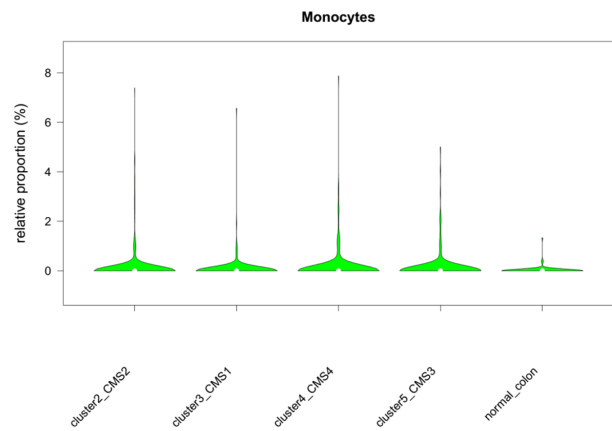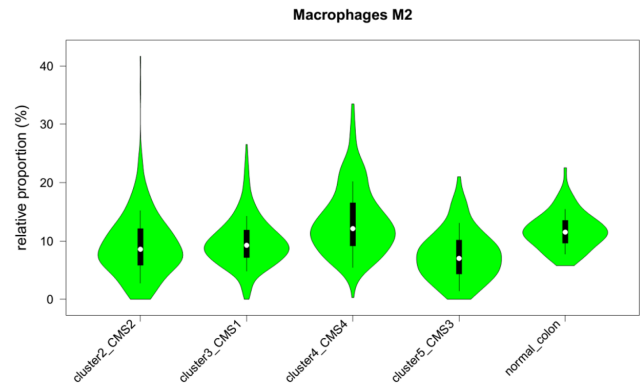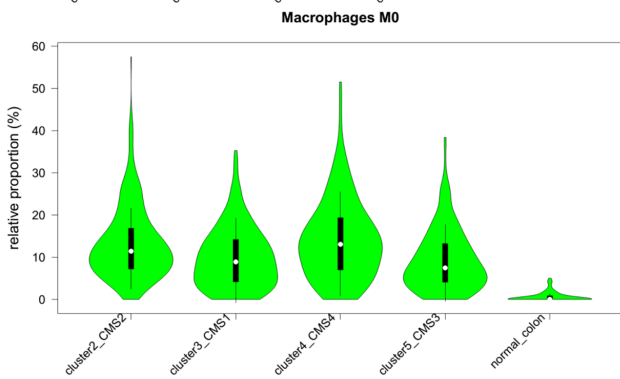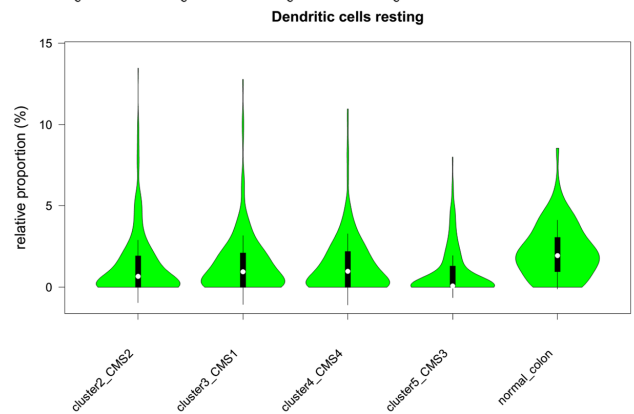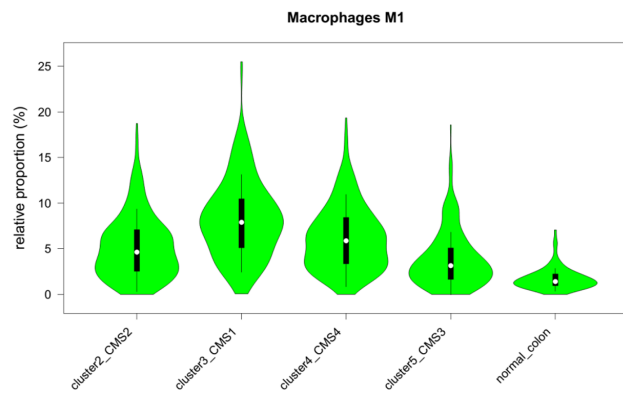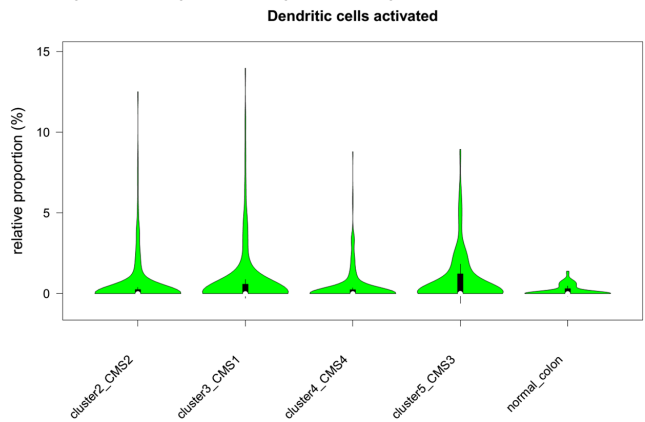

(Continued)

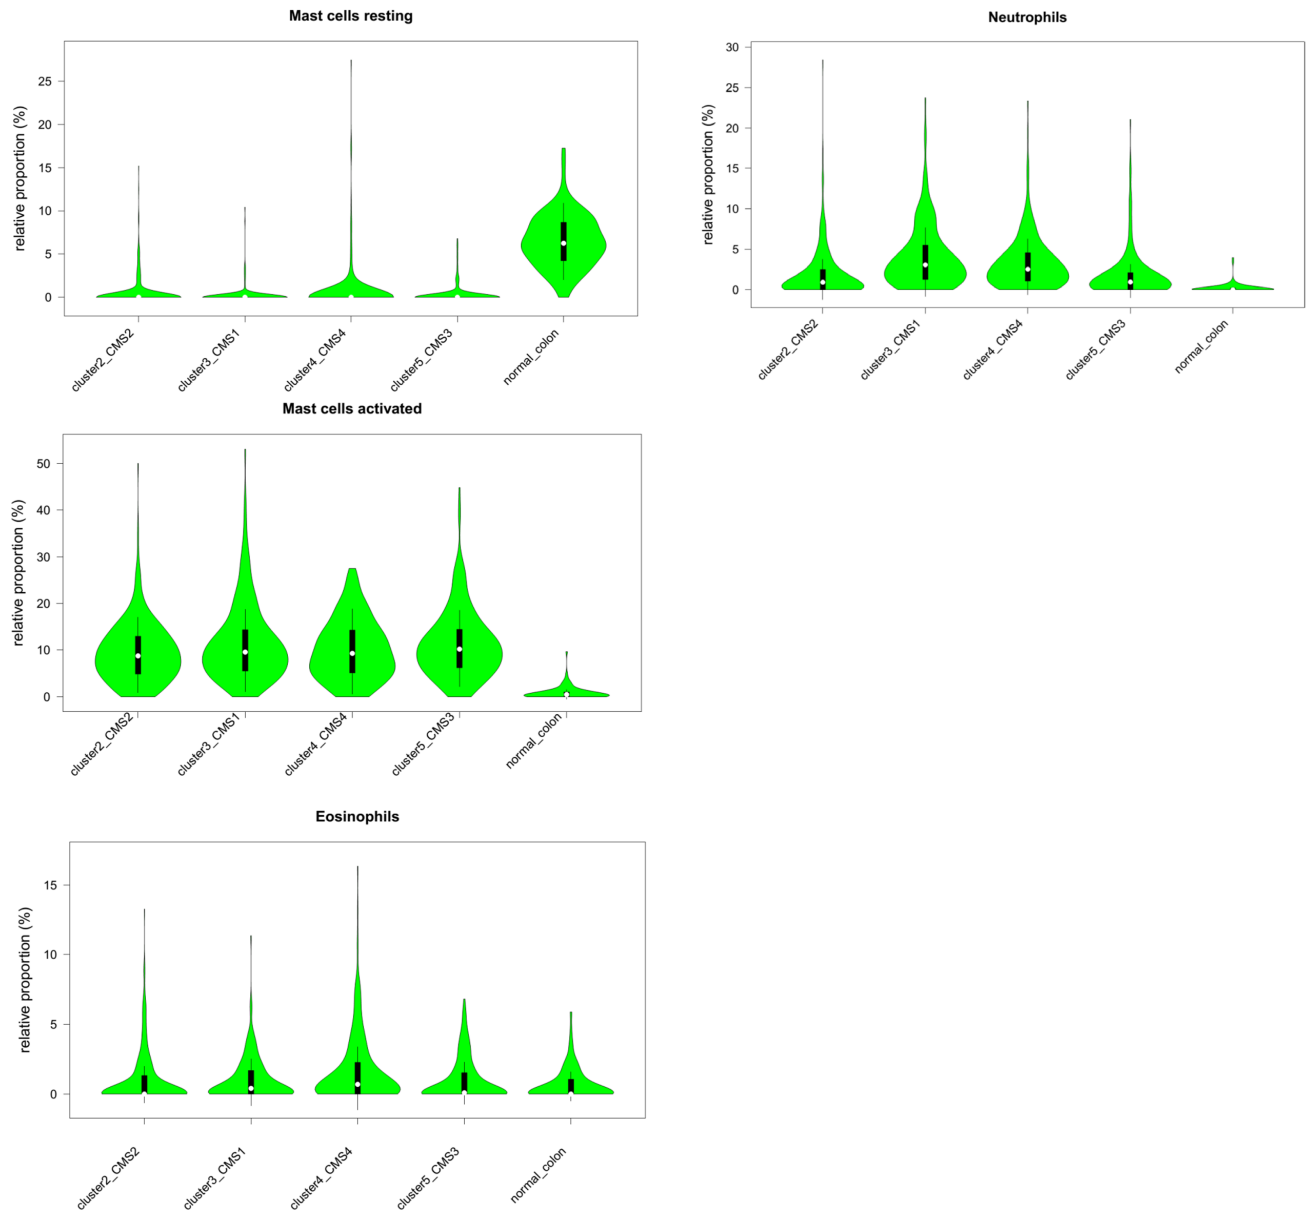

**Supplementary Figure 3: Violin plots visualizing the densities of computed proportions of 22 leukocyte subpopulations in each CRC cluster and normal colon samples. Mean is marked with a white circle.**

### Cluster2-CMS2

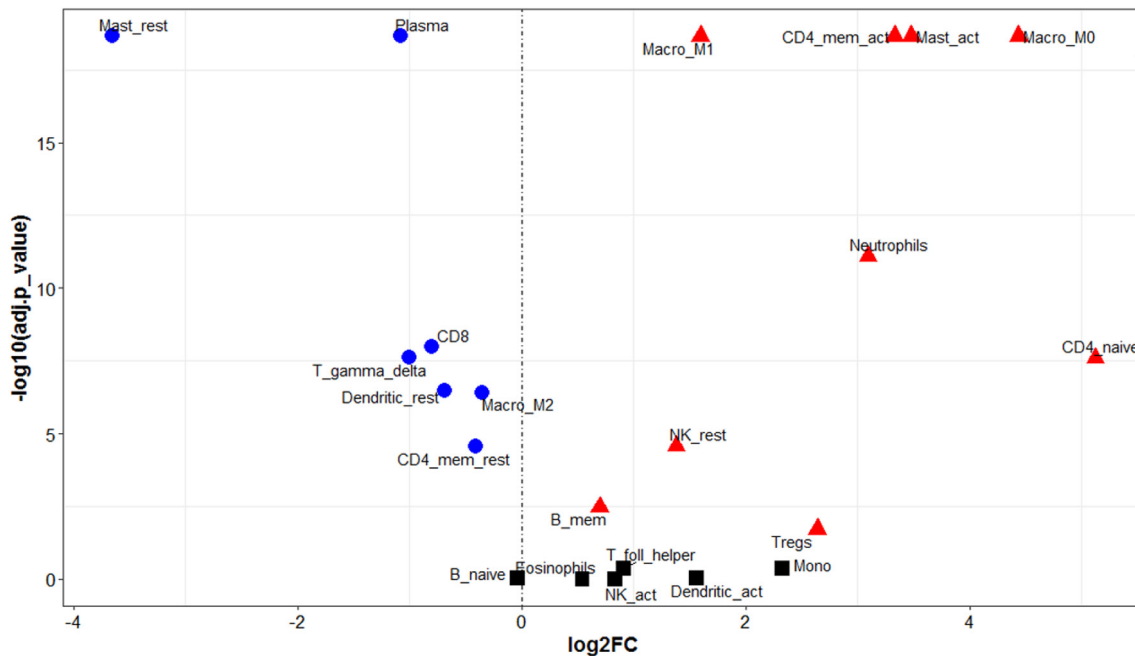

### Cluster3-CMS1

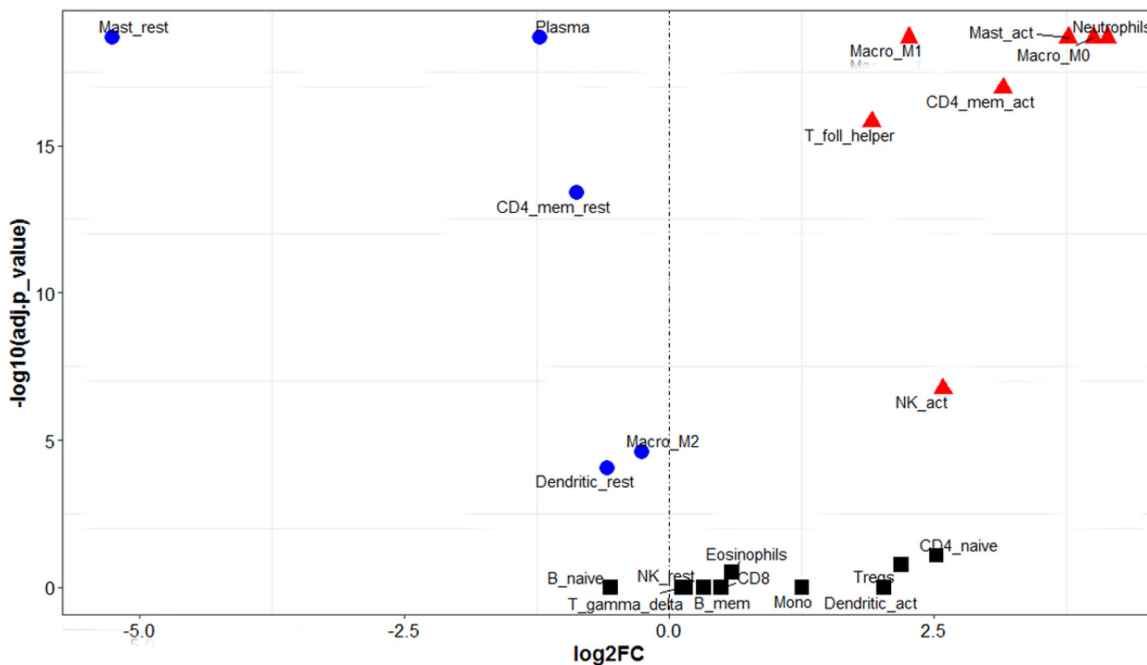

(Continued)

### Cluster4-CMS4

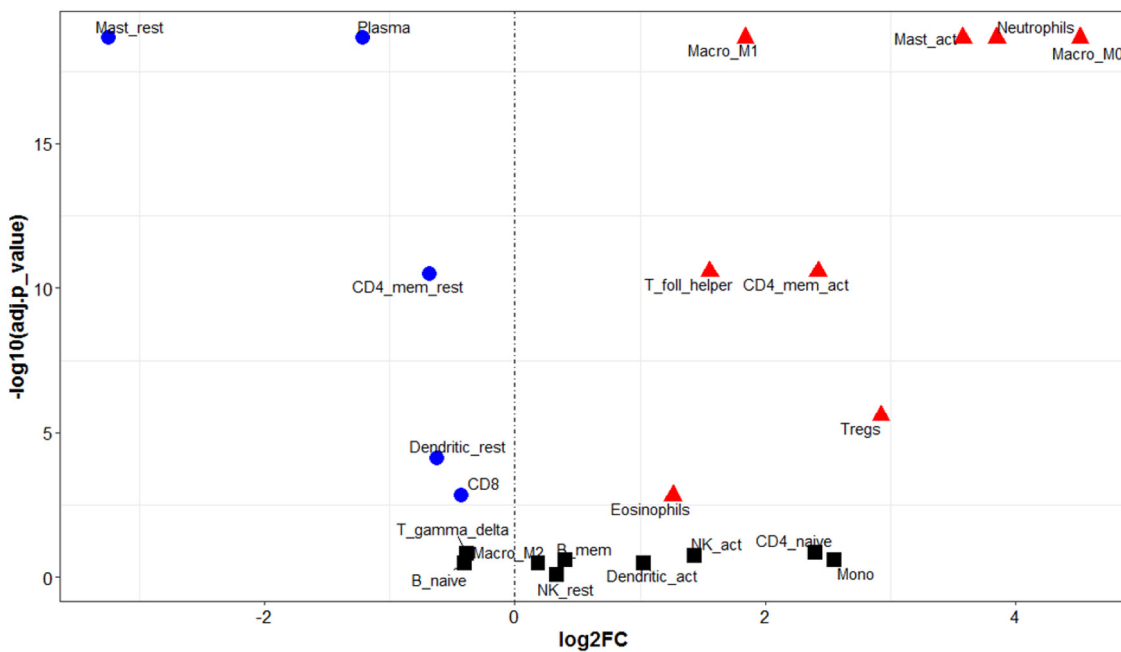

### Cluster5-CMS3

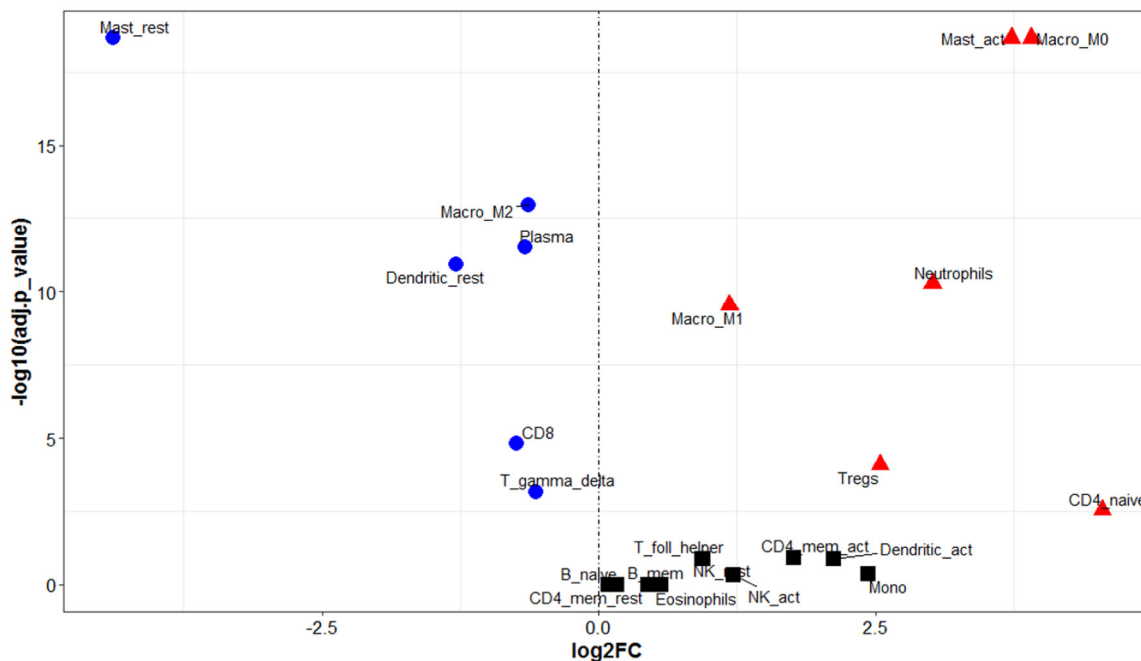

**Supplementary Figure 4: Volcano plots showing average fold changes of cell proportions and statistical significance (adjusted p-value) of comparison between CRC cluster and normal colon. Blue dots represent cells that were significantly depleted in a given CRC cluster(when compared to normal samples). Black squares represents cells with insignificant changes. Red rectangles represent cells significantly enriched in a given CRC cluster (when compared to normal samples).**



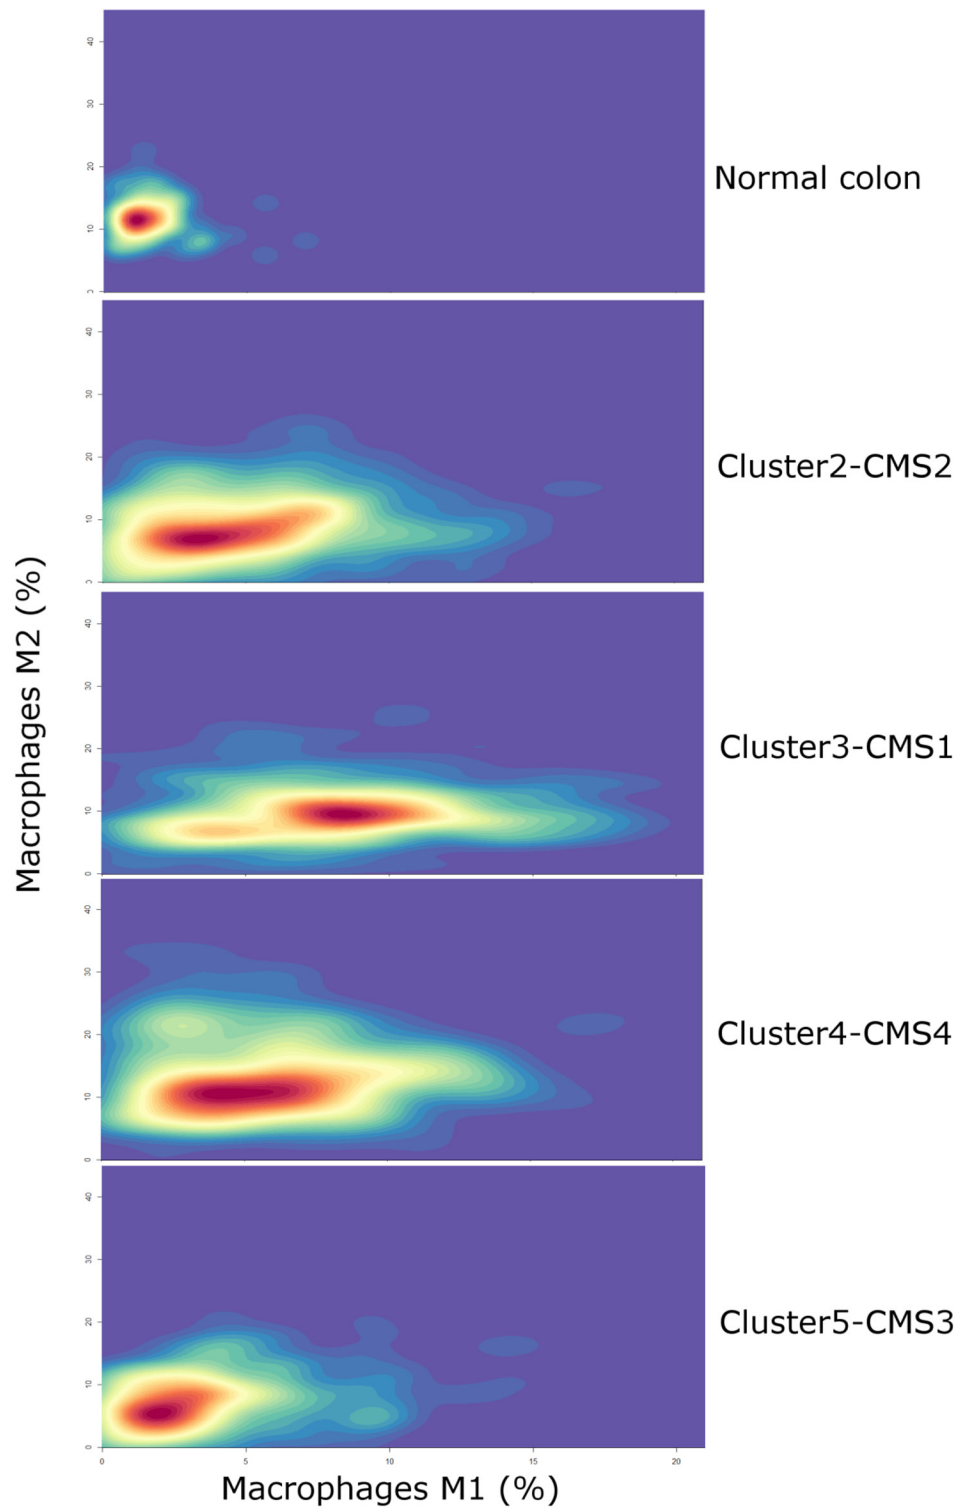

**Supplementary Figure 5: 2D histograms that visualizing relation between proportions of macrophages M1 and M2 in each sample.** Histograms were drawn for each CRC cluster and normal colon samples separately. Note higher content of macrophages M2 in normal tissue and a higher content of macrophages M1 in cancer tissue.

**Supplementary Table 1: Detailed data on leukocytes characterized in this study**

| Cell Type <sup>s</sup>       | Markers used <sup>s</sup>                                      | Abbreviation used in the manuscript | Immune branch (adaptive / innate) |
|------------------------------|----------------------------------------------------------------|-------------------------------------|-----------------------------------|
| B cells naive                | CD19+CD27- IgG/A-                                              | naive B cells                       | adaptive                          |
| B cells memory               | CD19+ CD27+                                                    | memory B cells                      | adaptive                          |
| Plasma cells                 | CD20+, CD138+ and CD19+                                        | plasma cells                        | adaptive                          |
| T cells CD8                  | CD3, CD8, CD45RA                                               | CTLs                                | adaptive                          |
| T cells CD4 naive            | CD4+                                                           | Th                                  | adaptive                          |
| T cells CD4 memory resting   | CD45ROhigh                                                     | memory resting Th                   | adaptive                          |
| T cells CD4 memory activated | CD45ROhigh; CD69, CD25 for activation                          | memory activated Th                 | adaptive                          |
| T cells follicular helper    | CXCR5hi, ICOShi                                                | Tfh                                 | adaptive                          |
| T cells regulatory           | CD4+ CD25hi                                                    | Tregs                               | adaptive                          |
| T cells gamma delta          | Not stated                                                     | gammadeltaT                         | innate                            |
| NK cells resting             | CD56                                                           | resting NK cells                    | innate                            |
| NK cells activated           | CD56 + CD69                                                    | activated NK cells                  | innate                            |
| Monocytes                    | N/A                                                            | monocytes                           | innate                            |
| Macrophages M0               | None known; identified by morphology and phagocytic capability | macrophages M0                      | innate                            |
| Macrophages M1               | None known; identified by morphology and phagocytic capability | macrophages M1                      | innate                            |
| Macrophages M2               | None known; identified by morphology and phagocytic capability | macrophages M2                      | innate                            |
| Dendritic cells resting      | N/A                                                            | resting DCs                         | innate                            |
| Dendritic cells activated    | N/A                                                            | activated DCs                       | innate                            |
| Mast cells resting           | N/A                                                            | resting mast cells                  | innate                            |
| Mast cells activated         | N/A                                                            | activated mast cells                | innate                            |
| Eosinophils                  | N/A                                                            | eosinophils                         | innate                            |
| Neutrophils                  | CD62L                                                          | neutrophils                         | innate                            |

<sup>s</sup> - data adopted from Newman et al., Nat Methods, 2015; 12:453-7.

**Supplementary Table 2: Samples analyzed in this study**

See Supplementary File 1
